# Supplementary material for: Integrated analysis of the transcriptome and metabolome of purple and green leaves of Tetrastigma hemsleyanum reveals gene expression patterns involved in anthocyanin biosynthesis
Source: PLoS One. 2020 Mar 9;15(3):e0230154. doi: 10.1371/journal.pone.0230154 (PMC7062267; doi:10.1371/journal.pone.0230154)
Supplement: S1 Table — (XLSX) [file pone.0230154.s003.xlsx]

## Sheet: Table S1
Table S1. Sequence information for primers.
Gene	Primer Sequences(5' to 3')	Size(bp)	Annealing (℃)
SYQ reference gene	CGGGCAAGTCCACCACTACT	95	60
	CATCTCAGCAGCCTCCTTCTCAAA
SYQ ANS	GTTGTGGAGGATGAAGGTGAGA	123	60
	GGGATGGAAGAGCTACTACTTC
SYQ CHI	CCAAAGGCGTAGACATCGATGT	148	60
	CCATAGCTGACAATCCTTCTTCAGT
SYQ CHS	CTCAACAAGCCAGACGATCATTC	131	60
	CCATGCACTTCCCTATGTTGTCA
SYQ DFR	CTAAGGACCCTGAGAATGAAGTG	147	60
	CTGGCTGTTGGTGTTCTTGAATGT
SYQ F3'5'H	GTCGGCGTTCTTCCTCTTCTAG	113	60
	GCCACCACCATGCTGTTAGTC
SYQ F3H	GTCGCCTCCCACCCATGAT	75	60
	GAAACGGTGTTGGAGCTGCTGT
SYQ UFGT	GCTGCGATGATAGGATGAAAGGA	88	60
	GAAGAGATAGAGCCAACCGTTGT
